# Supplementary material
Source: PubMed Central journal article supplement (PMC5007773)
Supplement: AEM.01063-16_zam999117405so1.pdf [file AEM.01063-16_zam999117405so1.pdf]

- 1 **Fig S1.** Alignment of AcsF gene sequences from AP (upper panel) and Cyanobacteria
- 2 (lower panel). Degenerate primers were designed to match the conserved regions in AP
- 3 species, but not to target Cyanobacteria.

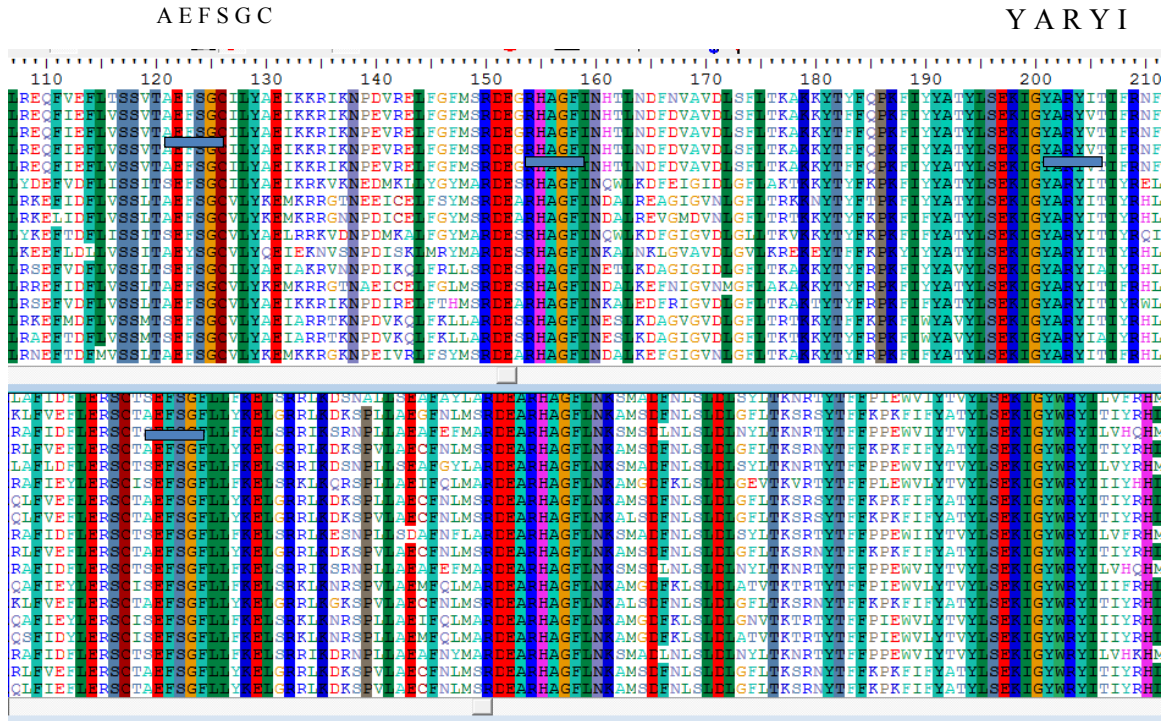

4

5 **Fig. S2** Test of *facF* primers on pure cultures. 1 - *G. aurantiaca*, 2 -  
6 *Rhodospirillum rubrum*, 3 - *G. phototrophica*, 4 - *Rhodovulum sulfidophilum*, 5 -  
7 *Erythrobacter* sp. NAP1, 6 - *Congregibacter litoralis*, 7 - *Hoeflea phototrophica*, 8 -  
8 *Rubrivivax gelatinosus*, 9 - *Roseobacter* sp. COL2P, M - DNA markers. *G. aurantiaca* and  
9 *Rsp. rubrum* served as negative controls.

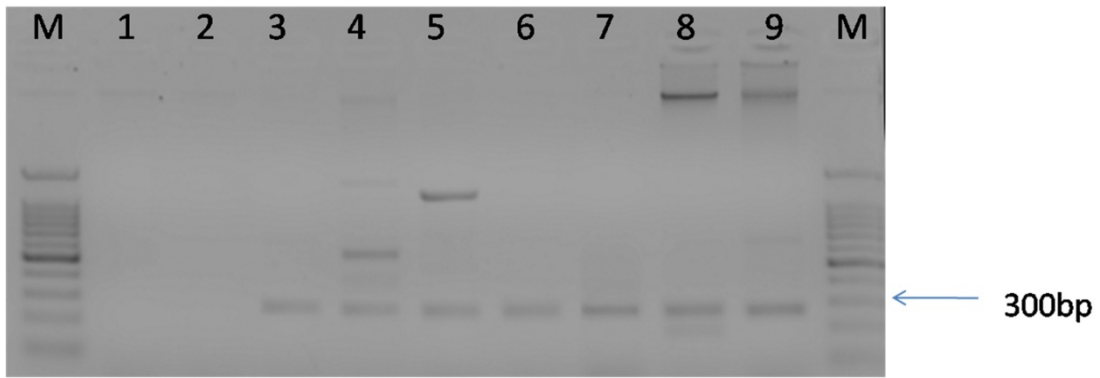

10

11

12
